# Supplementary material
Source: PubMed Central journal article supplement (PMC3275800)
Supplement: Supp_Data.pdf [file Supp_Data.pdf]

## Supplementary Data

**SUPPLEMENTARY FILE S1.** Cytoscape compatible file of Core network is available at <https://sites.google.com/a/isu.edu/egg/people/pete-hallock> (Cytoscape software can be downloaded for free at [www.cytoscape.org](http://www.cytoscape.org)).

**SUPPLEMENTARY FILE S2.** Cytoscape compatible file of Expanded network is available at <https://sites.google.com/a/isu.edu/egg/people/pete-hallock>.

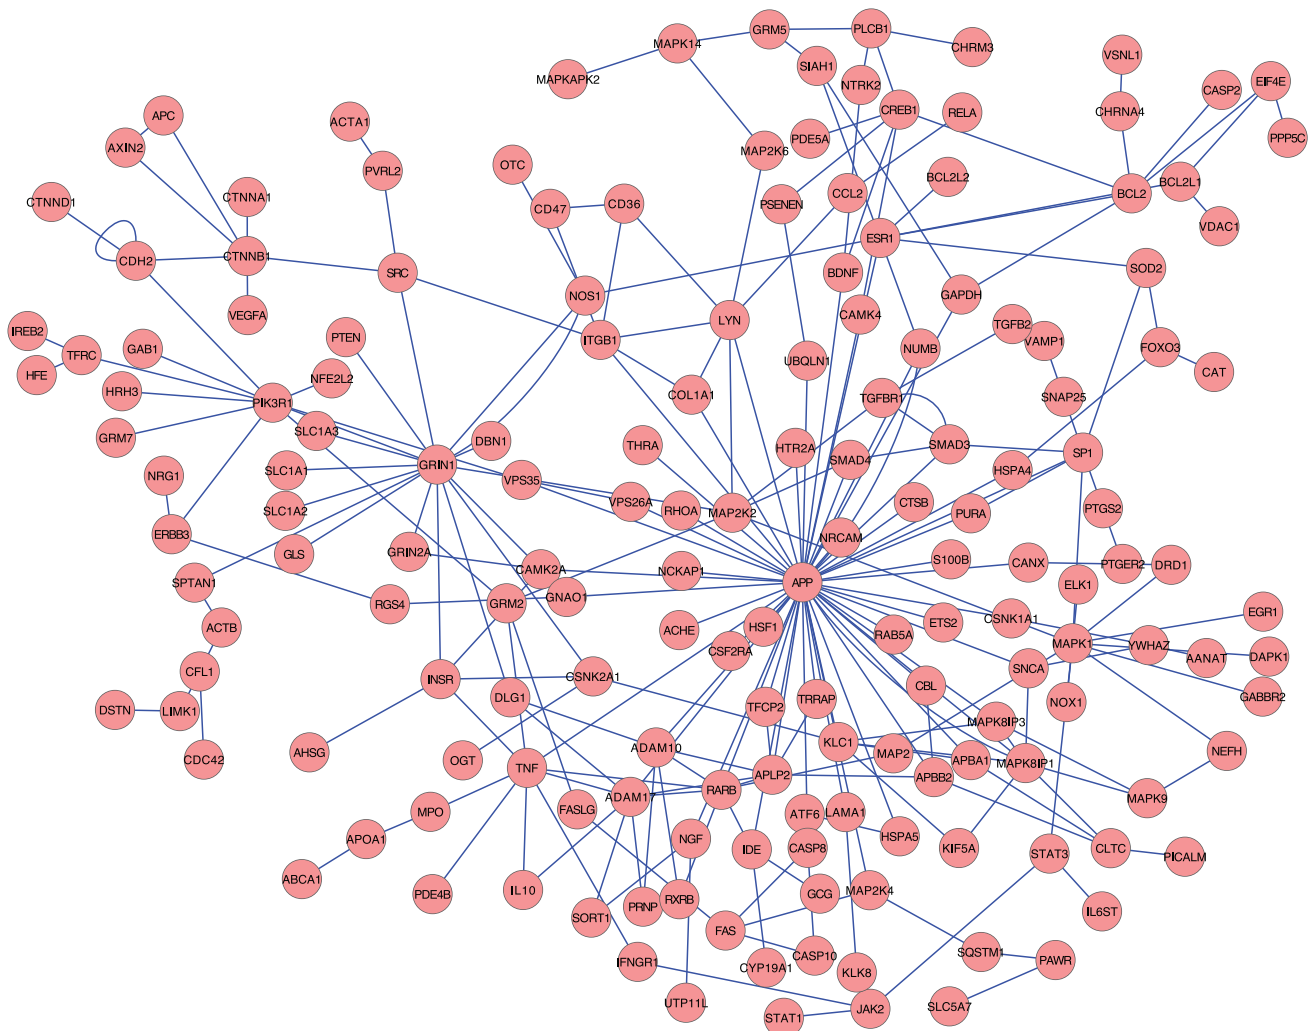

**SUPPLEMENTARY FIG. S3.** Network view of downregulated connected nodes from Nunez-Iglesias study.





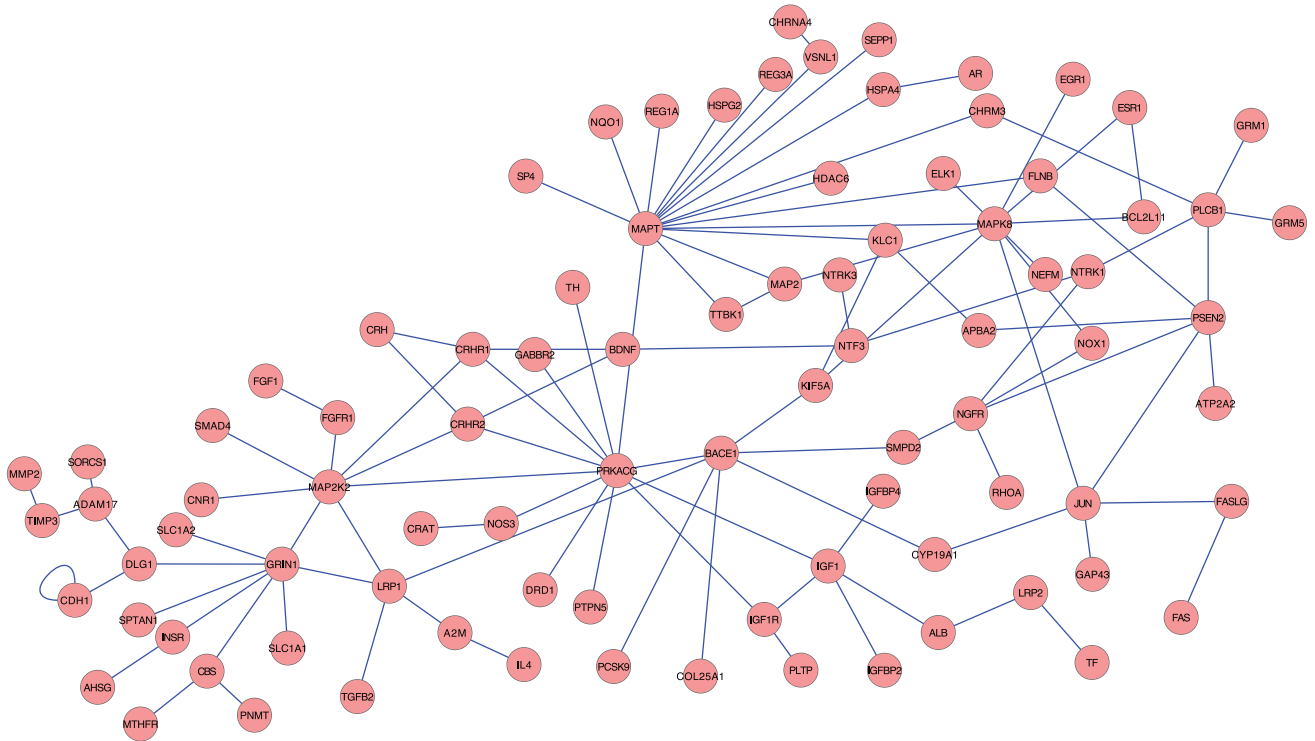

**SUPPLEMENTARY FIG. S7.** Network view of downregulated connected nodes from Chen study.

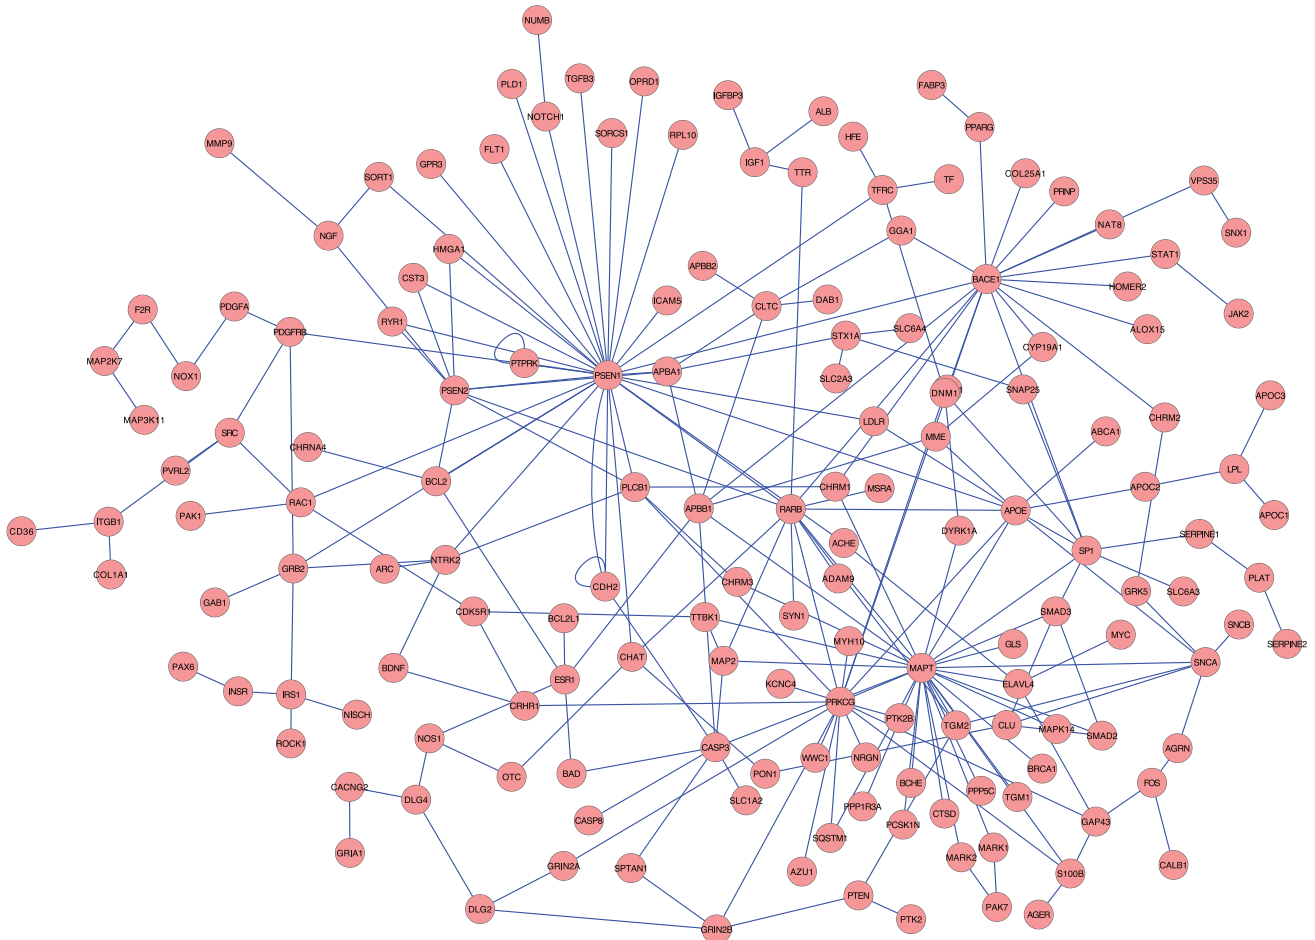

**SUPPLEMENTARY FIG. S8.** Network view of upregulated connected nodes from Chen study.
